# Supplementary material for: GLP-1 based therapies and disease course of inflammatory bowel disease
Source: PubMed Central journal article supplement — eClinicalMedicine. 2021 Jun 23;37:100979. doi: 10.1016/j.eclinm.2021.100979 (PMC8343256; doi:10.1016/j.eclinm.2021.100979), 2021-06-23
Supplement: mmc1.pdf [file mmc1.pdf]

## **Caption for supplementary material**

**Detailed description of the algorithm used to define type 2 diabetes**

**Supplementary table 1. Codes used to record inflammatory bowel disease and disease severity and course of inflammatory bowel disease**

**Detailed description of the IBD severity score**

**Supplementary table 2. Codes used to record treatment with antidiabetic therapy**

**Supplementary table 3. Codes used to record comorbidities related to type 2 diabetes**
