# Supplementary material for: GLP-1 based therapies and disease course of inflammatory bowel disease
Source: PubMed Central journal article supplement — eClinicalMedicine. 2021 Jun 23;37:100979. doi: 10.1016/j.eclinm.2021.100979 (PMC8343256; doi:10.1016/j.eclinm.2021.100979), 2021-06-23
Supplement: mmc2.pdf [file mmc2.pdf]

## **SUPPLEMENTARY MATERIAL**

### *GLP-1 based therapies and disease course of inflammatory bowel disease*

#### **Detailed description of the algorithm used to define type 2 diabetes**

Type 2 diabetes (T2D) was defined as a registration with ICD-8 code 250 or ICD-10 code E11 in the Danish National Patient Registry and/or two or more purchases of glucose-lowering drugs with ATC-code A10B. Patients with more registrations with type 1 diabetes (T1D) than with T2D or with the last known registration with T1D was excluded to avoid T1D misclassified as T2D. We also excluded females who had a registration with polycystic ovarian syndrome (PCOS) (ICD-10-code E282) and females who only purchased metformin (ACT-code A10BA02) and clomifen (ACT-code G03GB02) or antiandrogens in combination with oestrogens (ATC-code G03HB) because these are more likely in treatment for PCOS than T2D.

**Supplementary table 1. Codes used to record inflammatory bowel disease and disease severity and course of inflammatory bowel disease**

| Variable                               | The Danish National Patient Register, ICD-8 codes | The Danish National Patient Register, ICD-10 codes | The Danish National Patient Register, Procedure codes                                                                          | The Register of Medicinal Product Statistic, ATC codes |
|----------------------------------------|---------------------------------------------------|----------------------------------------------------|--------------------------------------------------------------------------------------------------------------------------------|--------------------------------------------------------|
| Crohn's disease*                       | 5630                                              | DK50                                               |                                                                                                                                |                                                        |
| Ulcerative colitis*                    | 56319, 56904                                      | DK51                                               |                                                                                                                                |                                                        |
| IBD-related medications                |                                                   |                                                    |                                                                                                                                |                                                        |
| 5-ASA                                  |                                                   |                                                    |                                                                                                                                | A07EC                                                  |
| Oral corticosteroids                   |                                                   |                                                    |                                                                                                                                | H02AB                                                  |
| Topical corticosteroids                |                                                   |                                                    |                                                                                                                                | A07EA01, A07EA02, A07EA06                              |
| Immunomodulators                       |                                                   |                                                    |                                                                                                                                | L01BB02, L04AX01, L04AX03                              |
| Other Immune suppressants              |                                                   |                                                    | BOHJ19H4, BOHJ28D, BOHJ18B                                                                                                     | L04AA06, L04AA29, L04AA33, L04AC05, L04AX02, L04AD01   |
| TNF- $\alpha$ -inhibitors              |                                                   |                                                    | BOHJ18A1, BOHJ18A3, BOHJ18A4                                                                                                   | L04AB04                                                |
| IBD-related inpatient hospitalizations |                                                   | DK50, DK51, DK56, DK60, DK61                       |                                                                                                                                |                                                        |
| IBD-related major surgery              |                                                   |                                                    | KJE, KJF, KJG, KJH**                                                                                                           |                                                        |
| IBD-related minor surgery              |                                                   |                                                    | KJHA00, KJHD20, KJHD23, KJHD30, KJHD33, KJHD60, KJAJ00, KKCH30, KKDH50, KJFA38, KJFA58, KJFA76, KJFA86, KJGA58, KJHD00, KTJA40 |                                                        |

ATC, Anatomical Therapeutic Classification; ICD, International Classification of Disease.

\* Patients with recordings for both UC and CD were classified with the second recording.

\*\* All codes and subcodes, except those defining minor surgery.

### **Detailed description of the IBD severity score**

We counted the number of oral corticosteroid redemptions (0, 1–2, >2), IBD-related inpatient hospitalisations (0, 1–2, >2), IBD-related major surgery (yes, no), and IBD-related minor surgery (0, 1–2, >2). Those were combined into a baseline severity score divided in mild (highest score=0 and no major surgery), moderate (highest score=1-2 and no major surgery), or severe disease (highest score >2 or major surgery).<sup>17</sup> This disease severity score has previously been used in a Danish nationwide cohort of IBD patients.<sup>17</sup>

## Supplementary table 2. Codes used to record treatment with antidiabetic therapy

| Variable                | Anatomical Therapeutic Classification (ATC) codes                                                                            |
|-------------------------|------------------------------------------------------------------------------------------------------------------------------|
| GLP-1 receptor agonists | A10BJ01, A10BJ02, A10BJ03, A10BJ05, A10BJ06, A10AE54, A10AE56                                                                |
| DPP-4 inhibitors        | A10BH01, A10BH02, A10BH03, A10BH04, A10BH05, A10BD07, A10BD08, A10BD09, A10BD10, A10BD11, A10BD13, A10BD19, A10BD21, A10BD24 |
| Biguanides              | A10BA02                                                                                                                      |
| Insulin and analogs     | A10AB01, A10AB04, A10AB05, A10AB06, A10AC01, A10AD01, A10AD04, A10AD05, A10AD06, A10AE01, A10AE04, A10AE05, A10AE06          |
| Sulfonylureas           | A10BB01, A10BB03, A10BB07, A10BB09, A10BB12                                                                                  |
| Thiazolidinediones      | A10BG02, A10BG03                                                                                                             |
| SGLT2 inhibitors        | A10BK01, A10BK02, A10BK03, A10BK04                                                                                           |
| Combination therapy     | A10BD03, A10BD04, A10BD15, A10BD16, A10BD20, A10BD23                                                                         |
| Others                  | A10BF01, A10BX02, A10BX03                                                                                                    |

**Supplementary table 3. Codes used to record comorbidities related to type 2 diabetes**

| <b>Variable</b>              | <b>International Classification of Disease codes, 10<sup>th</sup> revision, and Anatomical Therapeutic Classification (ATC) codes</b> |
|------------------------------|---------------------------------------------------------------------------------------------------------------------------------------|
| Diabetic nephropathy         | DE112, DE142, DN083                                                                                                                   |
| Diabetic retinopathy         | DE113, DE143, DH280, DH360, DH334B                                                                                                    |
| Diabetic neuropathy          | DE114, DE144, DG590, DG632, DG990                                                                                                     |
| Myocardial infarction        | DI21, DI23                                                                                                                            |
| Heart failure                | DI50, DI110, DI130, DI132                                                                                                             |
| Cerebrovascular disease      | DI60-DI69, DG45, DG46                                                                                                                 |
| Other diabetic complications | DE115, DE116, DE117, DE118                                                                                                            |
| Lipid-lowering drugs         | C10                                                                                                                                   |
| Antihypertensive drugs       | C02, C03, C07, C08, C09                                                                                                               |
